# Supplementary material for: Evaluation of Two PCR Tests for Coxiella burnetii Detection in Dairy Cattle Farms Using Latent Class Analysis
Source: PLoS One. 2015 Dec 16;10(12):e0144608. doi: 10.1371/journal.pone.0144608 (PMC4683090; doi:10.1371/journal.pone.0144608)
Supplement: S1 R Code — (R) [file pone.0144608.s002.R]

## libraries
library(R2OpenBUGS)
library(coda)
path_to_bugs <- "C:/Program Files (x86)/OpenBUGS/OpenBUGS323/OpenBUGS.exe"


#################################################################################################
######                 Functions
#################################################################################################
## Function that computes the summary for mcmc chains
summary_chains <- function(x){
  
  z = c(mean(x), 
        sd = sd(x),
        quantile(x, c(.025, .5, .975)),
        length(x))
  
  names(z) <- c("mean", "sd", "qtl2_5", "median", "qtl97_5", "sample")
  return(z)
  
}

## Folders used to store model resutls
## created if do not exist
if(!"figs" %in% dir()) dir.create("figs")
if(!"results" %in% dir()) dir.create("results")

#################################################################################################
######                 Data
#################################################################################################
## Data loaded - data file must be in the working directory
qfv <- read.csv("data.csv")

## Creating response matrix
Y <- matrix(rep(0, nrow(qfv) * 4),
            ncol = 4)
## Columns
# 1: Test1 = 0, Test2 = 0
# 2: Test1 = 0, Test2 = 1
# 3: Test1 = 1, Test2 = 0
# 4: Test1 = 1, Test2 = 1
Y[, 1] <- with(qfv,
               ifelse(PCRBTMBIN == 0 & PCREDCBIN == 0, 1, 0))
Y[, 2] <- with(qfv,
               ifelse(PCRBTMBIN == 0 & PCREDCBIN == 1, 1, 0))
Y[, 3] <- with(qfv,
               ifelse(PCRBTMBIN == 1 & PCREDCBIN == 0, 1, 0))
Y[, 4] <- with(qfv,
               ifelse(PCRBTMBIN == 1 & PCREDCBIN == 1, 1, 0))


#################################################################################################
######                 Bugs Models parameters
#################################################################################################
n_iter   <- 10000
n_burnin <- 5000
n_chains <- 3
bugs_debug <- TRUE


#####################################################################################################
#######                 Bugs Model 1.1
#####################################################################################################
model_name <- "model_1"
## Columns
# 1: Test1 = 0, Test2 = 0
# 2: Test1 = 0, Test2 = 1
# 3: Test1 = 1, Test2 = 0
# 4: Test1 = 1, Test2 = 1
model_bugs <- function(){
  
  for(j in 1:J){
    
    Y[j, 1:4] ~ dmulti(theta[j, 1:4], 1)
    
    theta[j, 1] <- Status[j] * (1 - Se1) * (1- Se2) + (1 - Status[j]) * (Sp1 * Sp2)
    theta[j, 2] <- Status[j] * (1 - Se1) * Se2 + (1 - Status[j]) * (Sp1 * (1 - Sp2))
    theta[j, 3] <- Status[j] * Se1 * (1 - Se2) + (1 - Status[j]) * ((1 - Sp1) * Sp2)
    theta[j, 4] <- Status[j] * Se1 * Se2 + (1 - Status[j]) * ((1 - Sp1) * (1 - Sp2))
    
  }
  
  ## Priors
  for(h in 1:H){
    
    pi[h, 1] <- tau0 / (tau0 + 1 - tau1)
    Status[4 * (h - 1) + 1] ~ dbern(pi[h, 1])
    
    for(k in 2:4){
      
      Status[4 * (h - 1) + k] ~ dbern(pi[h, k])
      pi[h, k] <- (1 - Status[4 * (h - 1) + k - 1]) * tau0 + Status[4 * (h - 1) + k - 1] * tau1
      
    }
    
  }
  
  ## Priors for sensitivities and specificities
  Se1 ~ dbeta(1, 1)
  Se2 ~ dbeta(1, 1)
  Sp1 <- 1
  Sp2 ~ dunif(0.95, 1)
  
  ## Probability of new infection
  tau0 ~ dbeta(1, 1)
  ## Probability of not elimintaing the infection
  tau1 ~ dbeta(1, 1)
  
}

write.model(model_bugs, "model_bugs.txt")

## Saved parameters
saved_param <- c("Se1", "Se2", "Sp2", "tau0", "tau1")

## Data
data_bugs <- with(qfv, list(
  J = length(PCRBTMBIN),
  H = max(herdID),
  Y = Y))


set.seed(123)
inits_bugs <- function(){
  list(
    Se1 = runif(1, 0, 1),
    Se2 = runif(1, 0, 1),
    Sp2 = runif(1, .95, 1),
    tau0 = runif(1, 0, 1),
    tau1 = runif(1, 0, 1),
    Status = rbinom(nrow(qfv), 1, .5))
}


fit_bugs <- bugs(
  data = data_bugs,
  inits = inits_bugs,
  model.file = "model_bugs.txt",
  parameters.to.save = saved_param,
  n.iter = n_iter,
  n.chains = n_chains,
  n.burnin = n_burnin,
  OpenBUGS.pgm = path_to_bugs,
  working.directory = getwd(),
  debug = bugs_debug)


if(!paste("results/", model_name, "/", sep = "") %in% dir()) dir.create(paste("results/", model_name, "/", sep = ""))

file.copy(from = "CODAindex.txt", 
          to = paste("results/", model_name, "/CODAindex.txt", sep = ""))
file.copy(from = "CODAchain1.txt", 
          to = paste("results/", model_name, "/CODAchain1.txt", sep = ""))
file.copy(from = "CODAchain2.txt", 
          to = paste("results/", model_name, "/CODAchain2.txt", sep = ""))
file.copy(from = "CODAchain3.txt", 
          to = paste("results/", model_name, "/CODAchain3.txt", sep = ""))

## Results
# Loading coda files
ch1 <- read.coda(output.file = paste("results/", model_name, "/CODAchain1.txt", sep = ""),
                 index.file = paste("results/", model_name, "/CODAindex.txt", sep = ""))
ch2 <- read.coda(output.file = paste("results/", model_name, "/CODAchain2.txt", sep = ""),
                 index.file = paste("results/", model_name, "/CODAindex.txt", sep = ""))
ch3 <- read.coda(output.file = paste("results/", model_name, "/CODAchain3.txt", sep = ""),
                 index.file = paste("results/", model_name, "/CODAindex.txt", sep = ""))

png(paste("figs/", model_name,"_chains.png"),
    width = 600, height = 600)
par(mfrow = c(3, 2), mar = c(4, 4, 1, 1))
plot(as.numeric(ch1[, "Se1"]), col = "red",
     type = "l", ylab = "")
lines(ch2[, "Se1"], col = "blue")
lines(ch3[, "Se1"], col = "green")
mtext(side = 2, "Se1", line = 2)

plot(as.numeric(ch1[, "Se2"]),  col = "red",
     type = "l", ylab = "")
lines(ch2[, "Se2"], col = "blue")
lines(ch3[, "Se2"], col = "green")
mtext(side = 2, "Se2", line = 2)

plot(as.numeric(ch1[, "Sp2"]),  col = "red",
     type = "l", ylab = "")
lines(ch2[, "Sp2"], col = "blue")
lines(ch3[, "Sp2"], col = "green")
mtext(side = 2, "Sp2", line = 2)

plot(as.numeric(ch1[, "tau0"]), col = "red",
     type = "l", ylab = "")
lines(ch2[, "tau0"], col = "blue")
lines(ch3[, "tau0"], col = "green")
mtext(side = 2, "tau0", line = 2)

plot(as.numeric(ch1[, "tau1"]), col = "red",
     type = "l", ylab = "")
lines(ch2[, "tau1"], col = "blue")
lines(ch3[, "tau1"], col = "green")
mtext(side = 2, "tau1", line = 2)

dev.off()


png(paste("figs/", model_name,"_densities.png"),
    width = 600, height = 600)
par(mfrow = c(3, 2), mar = c(4, 4, 1, 1))
plot(density(c(ch1[, "Se1"], ch2[, "Se1"], ch3[, "Se1"])),
     main = "Se1")
plot(density(c(ch1[, "Se2"], ch2[, "Se2"], ch3[, "Se2"])),
     main = "Se2")
plot(density(c(ch1[, "Sp2"], ch2[, "Sp2"], ch3[, "Sp2"])),
     main = "Sp2")
plot(density(c(ch1[, "tau0"], ch2[, "tau0"], ch3[, "tau0"])),
     main = "tau0")
plot(density(c(ch1[, "tau1"], ch2[, "tau1"], ch3[, "tau1"])),
     main = "tau1")
dev.off()

## Writing results to .csv files
# Gelman Rubin convergence test
write.csv(gelman.diag(mcmc.list(ch1, ch2, ch3))$psrf,
          paste("results/", model_name, "_gelman_diag.csv", sep = ""))
png(paste("figs/", model_name,"_GelmanDiag.png"),
    width = 600, height = 600)
gelman.plot(mcmc.list(ch1, ch2, ch3))
dev.off()

## Parameters summaries
write.csv(apply(rbind(ch1, ch2, ch3), 2, summary_chains),
          paste("results/", model_name, "_summary.csv", sep = ""))


#####################################################################################################
#######                 Bugs Model 2
#####################################################################################################
model_name <- "model_12"
## Se1 and Se2 correlation modelled using Toft specification
## Columns
# 1: Test1 = 0, Test2 = 0
# 2: Test1 = 0, Test2 = 1
# 3: Test1 = 1, Test2 = 0
# 4: Test1 = 1, Test2 = 1
model_bugs <- function(){
  
  for(j in 1:J){
    
    Y[j, 1:4] ~ dmulti(theta[j, 1:4], 1)
    
    theta[j, 1] <- Status[j] * (1 - Se1) * (1- Se2) + (1 - Status[j]) * (Sp1 * Sp2)
    theta[j, 2] <- Status[j] * (1 - Se1) * Se2 + (1 - Status[j]) * (Sp1 * (1 - Sp2))
    theta[j, 3] <- Status[j] * Se1 * (1 - Se2) + (1 - Status[j]) * ((1 - Sp1) * Sp2)
    theta[j, 4] <- Status[j] * Se1 * Se2 + (1 - Status[j]) * ((1 - Sp1) * (1 - Sp2))
    
  }
  
  ## Priors
  for(h in 1:H){
    
    pi[h, 1] <- tau0 / (tau0 + 1 - tau1)
    Status[4 * (h - 1) + 1] ~ dbern(pi[h, 1])
    
    for(k in 2:4){
      
      Status[4 * (h - 1) + k] ~ dbern(pi[h, k])
      pi[h, k] <- (1 - Status[4 * (h - 1) + k - 1]) * tau0 + Status[4 * (h - 1) + k - 1] * tau1
      
    }
    
  }
  
  ## Priors for sensitivities and specificities
  Se1 ~ dbeta(1, 1)
  Se2 ~ dbeta(1, 1)
  Sp1 <- 1
  Sp2 ~ dbeta(1, 1)
  
  ## Probability of new infection
  tau0 ~ dbeta(1, 1)
  ## Probability of not elimintaing the infection
  tau1 ~ dbeta(1, 1)
  
}

write.model(model_bugs, "model_bugs.txt")

## Saved parameters
saved_param <- c("Se1", "Se2", "Sp2", "tau0", "tau1")

## Data
data_bugs <- with(qfv, list(
  J = length(PCRBTMBIN),
  H = max(herdID),
  Y = Y))


set.seed(123)
inits_bugs <- function(){
  list(
    Se1 = runif(1, 0, 1),
    Se2 = runif(1, 0, 1),
    Sp2 = runif(1, .95, 1),
    tau0 = runif(1, 0, 1),
    tau1 = runif(1, 0, 1),
    Status = rbinom(nrow(qfv), 1, .5))
}


fit_bugs <- bugs(
  data = data_bugs,
  inits = inits_bugs,
  model.file = "model_bugs.txt",
  parameters.to.save = saved_param,
  n.iter = n_iter,
  n.chains = n_chains,
  n.burnin = n_burnin,
  OpenBUGS.pgm = path_to_bugs,
  working.directory = getwd(),
  debug = bugs_debug)


if(!paste("results/", model_name, "/", sep = "") %in% dir()) dir.create(paste("results/", model_name, "/", sep = ""))

file.copy(from = "CODAindex.txt", 
          to = paste("results/", model_name, "/CODAindex.txt", sep = ""))
file.copy(from = "CODAchain1.txt", 
          to = paste("results/", model_name, "/CODAchain1.txt", sep = ""))
file.copy(from = "CODAchain2.txt", 
          to = paste("results/", model_name, "/CODAchain2.txt", sep = ""))
file.copy(from = "CODAchain3.txt", 
          to = paste("results/", model_name, "/CODAchain3.txt", sep = ""))

## Results
# Loading coda files
ch1 <- read.coda(output.file = paste("results/", model_name, "/CODAchain1.txt", sep = ""),
                 index.file = paste("results/", model_name, "/CODAindex.txt", sep = ""))
ch2 <- read.coda(output.file = paste("results/", model_name, "/CODAchain2.txt", sep = ""),
                 index.file = paste("results/", model_name, "/CODAindex.txt", sep = ""))
ch3 <- read.coda(output.file = paste("results/", model_name, "/CODAchain3.txt", sep = ""),
                 index.file = paste("results/", model_name, "/CODAindex.txt", sep = ""))


png(paste("figs/", model_name,"_chains.png"),
    width = 600, height = 600)
par(mfrow = c(3, 2), mar = c(4, 4, 1, 1))
plot(as.numeric(ch1[, "Se1"]), col = "red",
     type = "l", ylab = "")
lines(ch2[, "Se1"], col = "blue")
lines(ch3[, "Se1"], col = "green")
mtext(side = 2, "Se1", line = 2)

plot(as.numeric(ch1[, "Se2"]),  col = "red",
     type = "l", ylab = "")
lines(ch2[, "Se2"], col = "blue")
lines(ch3[, "Se2"], col = "green")
mtext(side = 2, "Se2", line = 2)

plot(as.numeric(ch1[, "Sp2"]),  col = "red",
     type = "l", ylab = "")
lines(ch2[, "Sp2"], col = "blue")
lines(ch3[, "Sp2"], col = "green")
mtext(side = 2, "Sp2", line = 2)

plot(as.numeric(ch1[, "tau0"]), col = "red",
     type = "l", ylab = "")
lines(ch2[, "tau0"], col = "blue")
lines(ch3[, "tau0"], col = "green")
mtext(side = 2, "tau0", line = 2)

plot(as.numeric(ch1[, "tau1"]), col = "red",
     type = "l", ylab = "")
lines(ch2[, "tau1"], col = "blue")
lines(ch3[, "tau1"], col = "green")
mtext(side = 2, "tau1", line = 2)

dev.off()


png(paste("figs/", model_name,"_densities.png"),
    width = 600, height = 600)
par(mfrow = c(3, 2), mar = c(4, 4, 1, 1))
plot(density(c(ch1[, "Se1"], ch2[, "Se1"], ch3[, "Se1"])),
     main = "Se1")
plot(density(c(ch1[, "Se2"], ch2[, "Se2"], ch3[, "Se2"])),
     main = "Se2")
plot(density(c(ch1[, "Sp2"], ch2[, "Sp2"], ch3[, "Sp2"])),
     main = "Sp2")
plot(density(c(ch1[, "tau0"], ch2[, "tau0"], ch3[, "tau0"])),
     main = "tau0")
plot(density(c(ch1[, "tau1"], ch2[, "tau1"], ch3[, "tau1"])),
     main = "tau1")
dev.off()

## Writing results to .csv files
# Gelman Rubin convergence test
write.csv(gelman.diag(mcmc.list(ch1, ch2, ch3))$psrf,
          paste("results/", model_name, "_gelman_diag.csv", sep = ""))
png(paste("figs/", model_name,"_GelmanDiag.png"),
    width = 600, height = 600)
gelman.plot(mcmc.list(ch1, ch2, ch3))
dev.off()

## Parameters summaries
write.csv(apply(rbind(ch1, ch2, ch3), 2, summary_chains),
          paste("results/", model_name, "_summary.csv", sep = ""))


#####################################################################################################
#######                 Bugs Model 1.1.1
#####################################################################################################
model_name <- "model_11"
## Se1 and Se2 correlation modelled using Toft specification
## Columns
# 1: Test1 = 0, Test2 = 0
# 2: Test1 = 0, Test2 = 1
# 3: Test1 = 1, Test2 = 0
# 4: Test1 = 1, Test2 = 1
model_bugs <- function(){
  
  for(j in 1:J){
    
    Y[j, 1:4] ~ dmulti(theta[j, 1:4], 1)
    
    theta[j, 1] <- Status[j] * ((1 - Se1) * (1- Se2) + cov_Se) + (1 - Status[j]) * (Sp1 * Sp2)
    theta[j, 2] <- Status[j] * ((1 - Se1) * Se2 - cov_Se) + (1 - Status[j]) * (Sp1 * (1 - Sp2))
    theta[j, 3] <- Status[j] * (Se1 * (1 - Se2) - cov_Se) + (1 - Status[j]) * ((1 - Sp1) * Sp2)
    theta[j, 4] <- Status[j] * (Se1 * Se2 + cov_Se) + (1 - Status[j]) * ((1 - Sp1) * (1 - Sp2))
    
  }
  
  ## Priors
  for(h in 1:H){
    
    pi[h, 1] <- tau0 / (tau0 + 1 - tau1)
    Status[4 * (h - 1) + 1] ~ dbern(pi[h, 1])
    
    for(k in 2:4){
      
      Status[4 * (h - 1) + k] ~ dbern(pi[h, k])
      pi[h, k] <- (1 - Status[4 * (h - 1) + k - 1]) * tau0 + Status[4 * (h - 1) + k - 1] * tau1
      
    }
    
  }
  
  ## Priors for sensitivities and specificities
  Se1 ~ dbeta(1, 1)
  Se2 ~ dbeta(1, 1)
  Sp1 <- 1
  Sp2 ~ dunif(0.95, 1)

  ## Priors for covariances
  cov_Se_lb <- max(-(1 - Se1)*(1 - Se2), -Se1 * Se2)
  cov_Se_ub <- min(Se1 * (1 - Se2), (1 - Se1) * Se2)
  cov_Se ~ dunif(cov_Se_lb, cov_Se_ub)  
  
  ## Probability of new infection
  tau0 ~ dbeta(1, 1)
  ## Probability of not elimintaing the infection
  tau1 ~ dbeta(1, 1)
  
}

write.model(model_bugs, "model_bugs.txt")

## Saved parameters
saved_param <- c("Se1", "Se2", "Sp2", "tau0", "tau1", "cov_Se")

## Data
data_bugs <- with(qfv, list(
  J = length(PCRBTMBIN),
  H = max(herdID),
  Y = Y))


set.seed(123)
inits_bugs <- function(){
  list(
    Se1 = runif(1, 0, 1),
    Se2 = runif(1, 0, 1),
    Sp2 = runif(1, .95, 1),
    cov_Se = runif(1, -.01, .01),
    tau0 = runif(1, 0, 1),
    tau1 = runif(1, 0, 1),
    Status = rbinom(nrow(qfv), 1, .5))
}


fit_bugs <- bugs(
  data = data_bugs,
  inits = inits_bugs,
  model.file = "model_bugs.txt",
  parameters.to.save = saved_param,
  n.iter = n_iter,
  n.chains = n_chains,
  n.burnin = n_burnin,
  OpenBUGS.pgm = path_to_bugs,
  working.directory = getwd(),
  debug = bugs_debug)


if(!paste("results/", model_name, "/", sep = "") %in% dir()) dir.create(paste("results/", model_name, "/", sep = ""))

file.copy(from = "CODAindex.txt", 
          to = paste("results/", model_name, "/CODAindex.txt", sep = ""))
file.copy(from = "CODAchain1.txt", 
          to = paste("results/", model_name, "/CODAchain1.txt", sep = ""))
file.copy(from = "CODAchain2.txt", 
          to = paste("results/", model_name, "/CODAchain2.txt", sep = ""))
file.copy(from = "CODAchain3.txt", 
          to = paste("results/", model_name, "/CODAchain3.txt", sep = ""))

## Results
# Loading coda files
ch1 <- read.coda(output.file = paste("results/", model_name, "/CODAchain1.txt", sep = ""),
                 index.file = paste("results/", model_name, "/CODAindex.txt", sep = ""))
ch2 <- read.coda(output.file = paste("results/", model_name, "/CODAchain2.txt", sep = ""),
                 index.file = paste("results/", model_name, "/CODAindex.txt", sep = ""))
ch3 <- read.coda(output.file = paste("results/", model_name, "/CODAchain3.txt", sep = ""),
                 index.file = paste("results/", model_name, "/CODAindex.txt", sep = ""))

png(paste("figs/", model_name,"_chains.png"),
    width = 600, height = 600)
par(mfrow = c(3, 2), mar = c(4, 4, 1, 1))
plot(as.numeric(ch1[, "Se1"]), col = "red",
     type = "l", ylab = "")
lines(ch2[, "Se1"], col = "blue")
lines(ch3[, "Se1"], col = "green")
mtext(side = 2, "Se1", line = 2)

plot(as.numeric(ch1[, "Se2"]),  col = "red",
     type = "l", ylab = "")
lines(ch2[, "Se2"], col = "blue")
lines(ch3[, "Se2"], col = "green")
mtext(side = 2, "Se2", line = 2)

plot(as.numeric(ch1[, "Sp2"]),  col = "red",
     type = "l", ylab = "")
lines(ch2[, "Sp2"], col = "blue")
lines(ch3[, "Sp2"], col = "green")
mtext(side = 2, "Sp2", line = 2)

plot(as.numeric(ch1[, "tau0"]), col = "red",
     type = "l", ylab = "")
lines(ch2[, "tau0"], col = "blue")
lines(ch3[, "tau0"], col = "green")
mtext(side = 2, "tau0", line = 2)

plot(as.numeric(ch1[, "tau1"]), col = "red",
     type = "l", ylab = "")
lines(ch2[, "tau1"], col = "blue")
lines(ch3[, "tau1"], col = "green")
mtext(side = 2, "tau1", line = 2)

plot(as.numeric(ch1[, "cov_Se"]), col = "red",
     type = "l", ylab = "")
lines(ch2[, "cov_Se"], col = "blue")
lines(ch3[, "cov_Se"], col = "green")
mtext(side = 2, "cov_Se", line = 2)

dev.off()


png(paste("figs/", model_name,"_densities.png"),
    width = 600, height = 600)
par(mfrow = c(3, 2), mar = c(4, 4, 1, 1))
plot(density(c(ch1[, "Se1"], ch2[, "Se1"], ch3[, "Se1"])),
     main = "Se1")
plot(density(c(ch1[, "Se2"], ch2[, "Se2"], ch3[, "Se2"])),
     main = "Se2")
plot(density(c(ch1[, "Sp2"], ch2[, "Sp2"], ch3[, "Sp2"])),
     main = "Sp2")
plot(density(c(ch1[, "tau0"], ch2[, "tau0"], ch3[, "tau0"])),
     main = "tau0")
plot(density(c(ch1[, "tau1"], ch2[, "tau1"], ch3[, "tau1"])),
     main = "tau1")
plot(density(c(ch1[, "cov_Se"], ch2[, "cov_Se"], ch3[, "cov_Se"])),
     main = "cov_Se")
dev.off()

## Writing results to .csv files
# Gelman Rubin convergence test
write.csv(gelman.diag(mcmc.list(ch1, ch2, ch3))$psrf,
          paste("results/", model_name, "_gelman_diag.csv", sep = ""))
png(paste("figs/", model_name,"_GelmanDiag.png"),
    width = 600, height = 600)
gelman.plot(mcmc.list(ch1, ch2, ch3))
dev.off()

## Parameters summaries
write.csv(apply(rbind(ch1, ch2, ch3), 2, summary_chains),
          paste("results/", model_name, "_summary.csv", sep = ""))


#####################################################################################################
#######                 Bugs Model 2.1
#####################################################################################################
model_name <- "model_121"
## Se1 and Se2 correlation modelled using Toft specification
## Columns
# 1: Test1 = 0, Test2 = 0
# 2: Test1 = 0, Test2 = 1
# 3: Test1 = 1, Test2 = 0
# 4: Test1 = 1, Test2 = 1
model_bugs <- function(){
  
  for(j in 1:J){
    
    Y[j, 1:4] ~ dmulti(theta[j, 1:4], 1)
    
    theta[j, 1] <- Status[j] * ((1 - Se1) * (1- Se2) + cov_Se) + (1 - Status[j]) * (Sp1 * Sp2)
    theta[j, 2] <- Status[j] * ((1 - Se1) * Se2 - cov_Se) + (1 - Status[j]) * (Sp1 * (1 - Sp2))
    theta[j, 3] <- Status[j] * (Se1 * (1 - Se2) - cov_Se) + (1 - Status[j]) * ((1 - Sp1) * Sp2)
    theta[j, 4] <- Status[j] * (Se1 * Se2 + cov_Se) + (1 - Status[j]) * ((1 - Sp1) * (1 - Sp2))
    
  }
  
  ## Priors
  for(h in 1:H){
    
    pi[h, 1] <- tau0 / (tau0 + 1 - tau1)
    Status[4 * (h - 1) + 1] ~ dbern(pi[h, 1])
    
    for(k in 2:4){
      
      Status[4 * (h - 1) + k] ~ dbern(pi[h, k])
      pi[h, k] <- (1 - Status[4 * (h - 1) + k - 1]) * tau0 + Status[4 * (h - 1) + k - 1] * tau1
      
    }
    
  }
  
  ## Priors for sensitivities and specificities
  Se1 ~ dbeta(1, 1)
  Se2 ~ dbeta(1, 1)
  Sp1 <- 1
  Sp2 ~ dbeta(1, 1)

  ## Priors for covariances
  cov_Se_lb <- max(-(1 - Se1)*(1 - Se2), -Se1 * Se2)
  cov_Se_ub <- min(Se1 * (1 - Se2), (1 - Se1) * Se2)
  cov_Se ~ dunif(cov_Se_lb, cov_Se_ub)  
  
  ## Probability of new infection
  tau0 ~ dbeta(1, 1)
  ## Probability of not elimintaing the infection
  tau1 ~ dbeta(1, 1)
  
}

write.model(model_bugs, "model_bugs.txt")

## Saved parameters
saved_param <- c("Se1", "Se2", "Sp2", "tau0", "tau1", "cov_Se")

## Data
data_bugs <- with(qfv, list(
  J = length(PCRBTMBIN),
  H = max(herdID),
  Y = Y))


set.seed(123)
inits_bugs <- function(){
  list(
    Se1 = runif(1, 0, 1),
    Se2 = runif(1, 0, 1),
    Sp2 = runif(1, .95, 1),
    cov_Se = runif(1, -.01, .01),
    tau0 = runif(1, 0, 1),
    tau1 = runif(1, 0, 1),
    Status = rbinom(nrow(qfv), 1, .5))
}


fit_bugs <- bugs(
  data = data_bugs,
  inits = inits_bugs,
  model.file = "model_bugs.txt",
  parameters.to.save = saved_param,
  n.iter = n_iter,
  n.chains = n_chains,
  n.burnin = n_burnin,
  OpenBUGS.pgm = path_to_bugs,
  working.directory = getwd(),
  debug = bugs_debug)


if(!paste("results/", model_name, "/", sep = "") %in% dir()) dir.create(paste("results/", model_name, "/", sep = ""))

file.copy(from = "CODAindex.txt", 
          to = paste("results/", model_name, "/CODAindex.txt", sep = ""))
file.copy(from = "CODAchain1.txt", 
          to = paste("results/", model_name, "/CODAchain1.txt", sep = ""))
file.copy(from = "CODAchain2.txt", 
          to = paste("results/", model_name, "/CODAchain2.txt", sep = ""))
file.copy(from = "CODAchain3.txt", 
          to = paste("results/", model_name, "/CODAchain3.txt", sep = ""))

## Results
# Loading coda files
ch1 <- read.coda(output.file = paste("results/", model_name, "/CODAchain1.txt", sep = ""),
                 index.file = paste("results/", model_name, "/CODAindex.txt", sep = ""))
ch2 <- read.coda(output.file = paste("results/", model_name, "/CODAchain2.txt", sep = ""),
                 index.file = paste("results/", model_name, "/CODAindex.txt", sep = ""))
ch3 <- read.coda(output.file = paste("results/", model_name, "/CODAchain3.txt", sep = ""),
                 index.file = paste("results/", model_name, "/CODAindex.txt", sep = ""))


png(paste("figs/", model_name,"_chains.png"),
    width = 600, height = 600)
par(mfrow = c(3, 2), mar = c(4, 4, 1, 1))
plot(as.numeric(ch1[, "Se1"]), col = "red",
     type = "l", ylab = "")
lines(ch2[, "Se1"], col = "blue")
lines(ch3[, "Se1"], col = "green")
mtext(side = 2, "Se1", line = 2)

plot(as.numeric(ch1[, "Se2"]),  col = "red",
     type = "l", ylab = "")
lines(ch2[, "Se2"], col = "blue")
lines(ch3[, "Se2"], col = "green")
mtext(side = 2, "Se2", line = 2)

plot(as.numeric(ch1[, "Sp2"]),  col = "red",
     type = "l", ylab = "")
lines(ch2[, "Sp2"], col = "blue")
lines(ch3[, "Sp2"], col = "green")
mtext(side = 2, "Sp2", line = 2)

plot(as.numeric(ch1[, "tau0"]), col = "red",
     type = "l", ylab = "")
lines(ch2[, "tau0"], col = "blue")
lines(ch3[, "tau0"], col = "green")
mtext(side = 2, "tau0", line = 2)

plot(as.numeric(ch1[, "tau1"]), col = "red",
     type = "l", ylab = "")
lines(ch2[, "tau1"], col = "blue")
lines(ch3[, "tau1"], col = "green")
mtext(side = 2, "tau1", line = 2)

plot(as.numeric(ch1[, "cov_Se"]), col = "red",
     type = "l", ylab = "")
lines(ch2[, "cov_Se"], col = "blue")
lines(ch3[, "cov_Se"], col = "green")
mtext(side = 2, "cov_Se", line = 2)

dev.off()


png(paste("figs/", model_name,"_densities.png"),
    width = 600, height = 600)
par(mfrow = c(3, 2), mar = c(4, 4, 1, 1))
plot(density(c(ch1[, "Se1"], ch2[, "Se1"], ch3[, "Se1"])),
     main = "Se1")
plot(density(c(ch1[, "Se2"], ch2[, "Se2"], ch3[, "Se2"])),
     main = "Se2")
plot(density(c(ch1[, "Sp2"], ch2[, "Sp2"], ch3[, "Sp2"])),
     main = "Sp2")
plot(density(c(ch1[, "tau0"], ch2[, "tau0"], ch3[, "tau0"])),
     main = "tau0")
plot(density(c(ch1[, "tau1"], ch2[, "tau1"], ch3[, "tau1"])),
     main = "tau1")
plot(density(c(ch1[, "cov_Se"], ch2[, "cov_Se"], ch3[, "cov_Se"])),
     main = "cov_Se")
dev.off()

## Writing results to .csv files
# Gelman Rubin convergence test
write.csv(gelman.diag(mcmc.list(ch1, ch2, ch3))$psrf,
          paste("results/", model_name, "_gelman_diag.csv", sep = ""))
png(paste("figs/", model_name,"_GelmanDiag.png"),
    width = 600, height = 600)
gelman.plot(mcmc.list(ch1, ch2, ch3))
dev.off()

## Parameters summaries
write.csv(apply(rbind(ch1, ch2, ch3), 2, summary_chains),
          paste("results/", model_name, "_summary.csv", sep = ""))
